# Supplementary material for: Pea protein hydrolysate stimulates GLP-1 secretion in NCI-H716 cells via simultaneously activating the sensing receptors CaSR and PepT1
Source: Royal Society of Chemistry journal article supplement (doi:10.1039/d4fo01290a), 2024-01-01
Supplement: d4fo01290a1.pdf [file d4fo01290a1.pdf]

1 **Pea protein hydrolysate stimulates GLP-1 secretion in NCI-H716 cells via**  
2 **simultaneously activating sensing receptors CaSR and PepT1**

3 Mingkai Zhang <sup>a</sup>, Ling Zhu <sup>a\*</sup>, Hui Zhang <sup>a\*</sup>, Xingguo Wang <sup>a</sup>, Gangcheng Wu <sup>a</sup>

4 <sup>a</sup>National Engineering Research Center for Functional Food, Collaborative

5 Innovation Center of Food Safety and Quality Control in Jiangsu Province, School of

6 Food Science and Technology, Jiangnan University, 1800 Lihu Road, Wuxi, 214122,

7 China

8 \*Corresponding authors: Ling Zhu and Hui Zhang

9 E-mail address: zhanghui@jiangnan.edu.cn

10 **Supporting Information description**

11 **Table captions**

12 **Table S1** Primer sequences for PCR

13 **Figure captions**

14 **Figure S1** Molecular weights distribution of PPH

15 **Figure S2** Free amino acids distribution of PPH

16 **Figure S3** The effects of PPH on NCI-H716 cells' viability. Different letters indicate

17 statistical differences ( $P < 0.05$ ).

**Table S1** Primer sequences for PCR

| Gene  | Forward (5'-3')           | Reverse (5'-3')               |
|-------|---------------------------|-------------------------------|
| GAPDH | TGACATCAAGAAGGTGGTGAAGCAG | GTGTCGCTGTTGAAGTCAGAGGAG      |
| GCG   | GAGACATGCTGAAGGGACCTTTAC  | TTCAACAATGGCGACCTCTTCTGG      |
| PCSK1 | TTCGTCTGGGCTTCGGGAAAC     | TGATGGAGATGGTGTAGATGCTGT<br>C |
| CaSR  | TGCCATCTGCTTCTTCTTGCC     | TGCTGAAGGTGATGAACTTGG         |
| PepT1 | GGACAAGCAGTCACCTCAGTAAGC  | GCCGATCAAGGACAGCACCAC         |

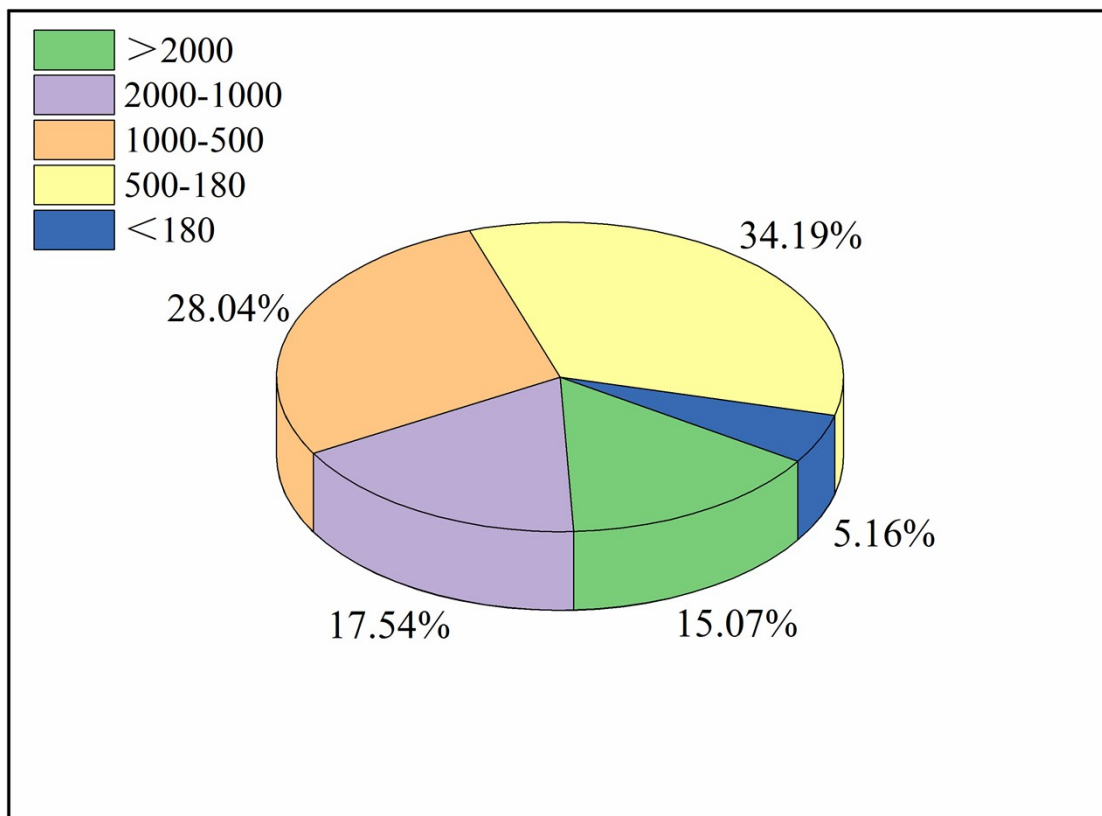

19

20

**Figure S1** Molecular weights distribution of PPH

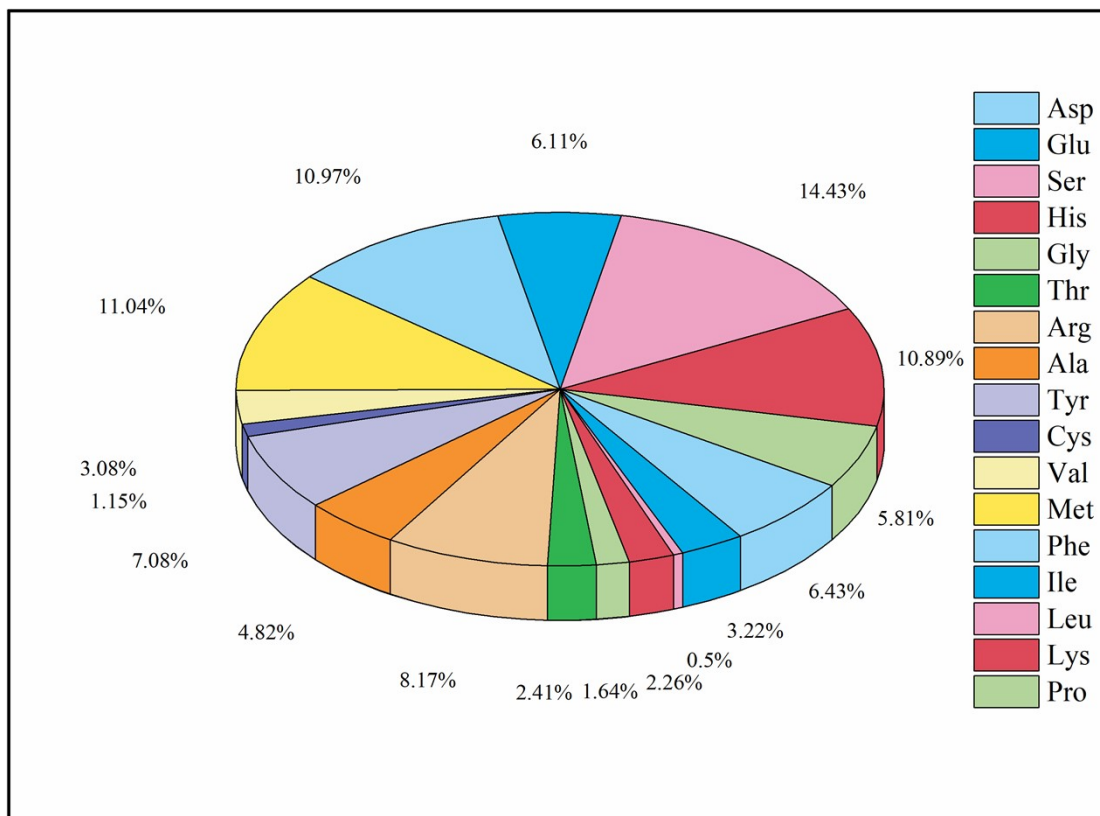

21

22

**Figure S2** Free amino acids distribution of PPH

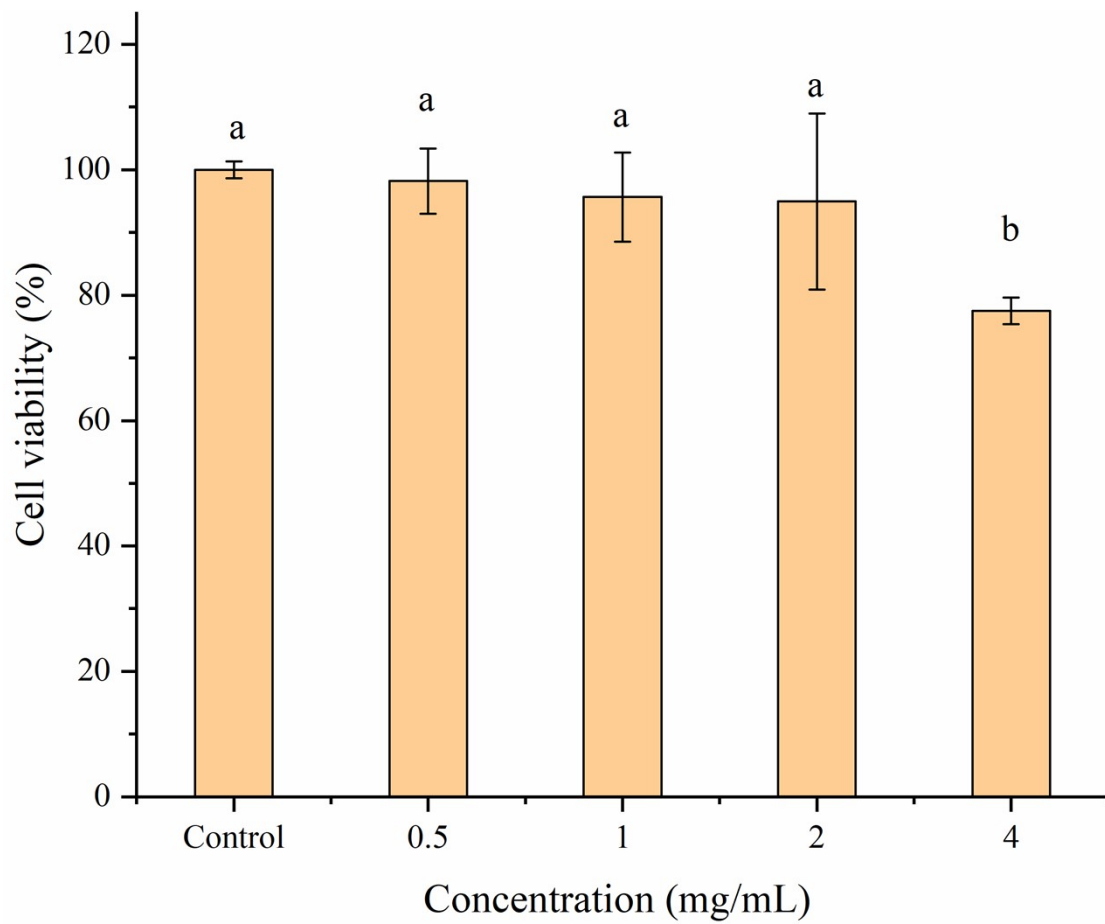

23

24 **Figure S3** The effects of PPH on NCI-H716 cells' viability. Different letters indicate

25

statistical differences ( $P < 0.05$ ).
